# Supplementary material for: A machine learning approach for the prediction of pulmonary hypertension
Source: PubMed Central journal article supplement (PMC6814224; doi:10.1371/journal.pone.0224453), 2019-10-25
Supplement: pone.0224453.s001.pdf [file pone.0224453.s001.pdf]

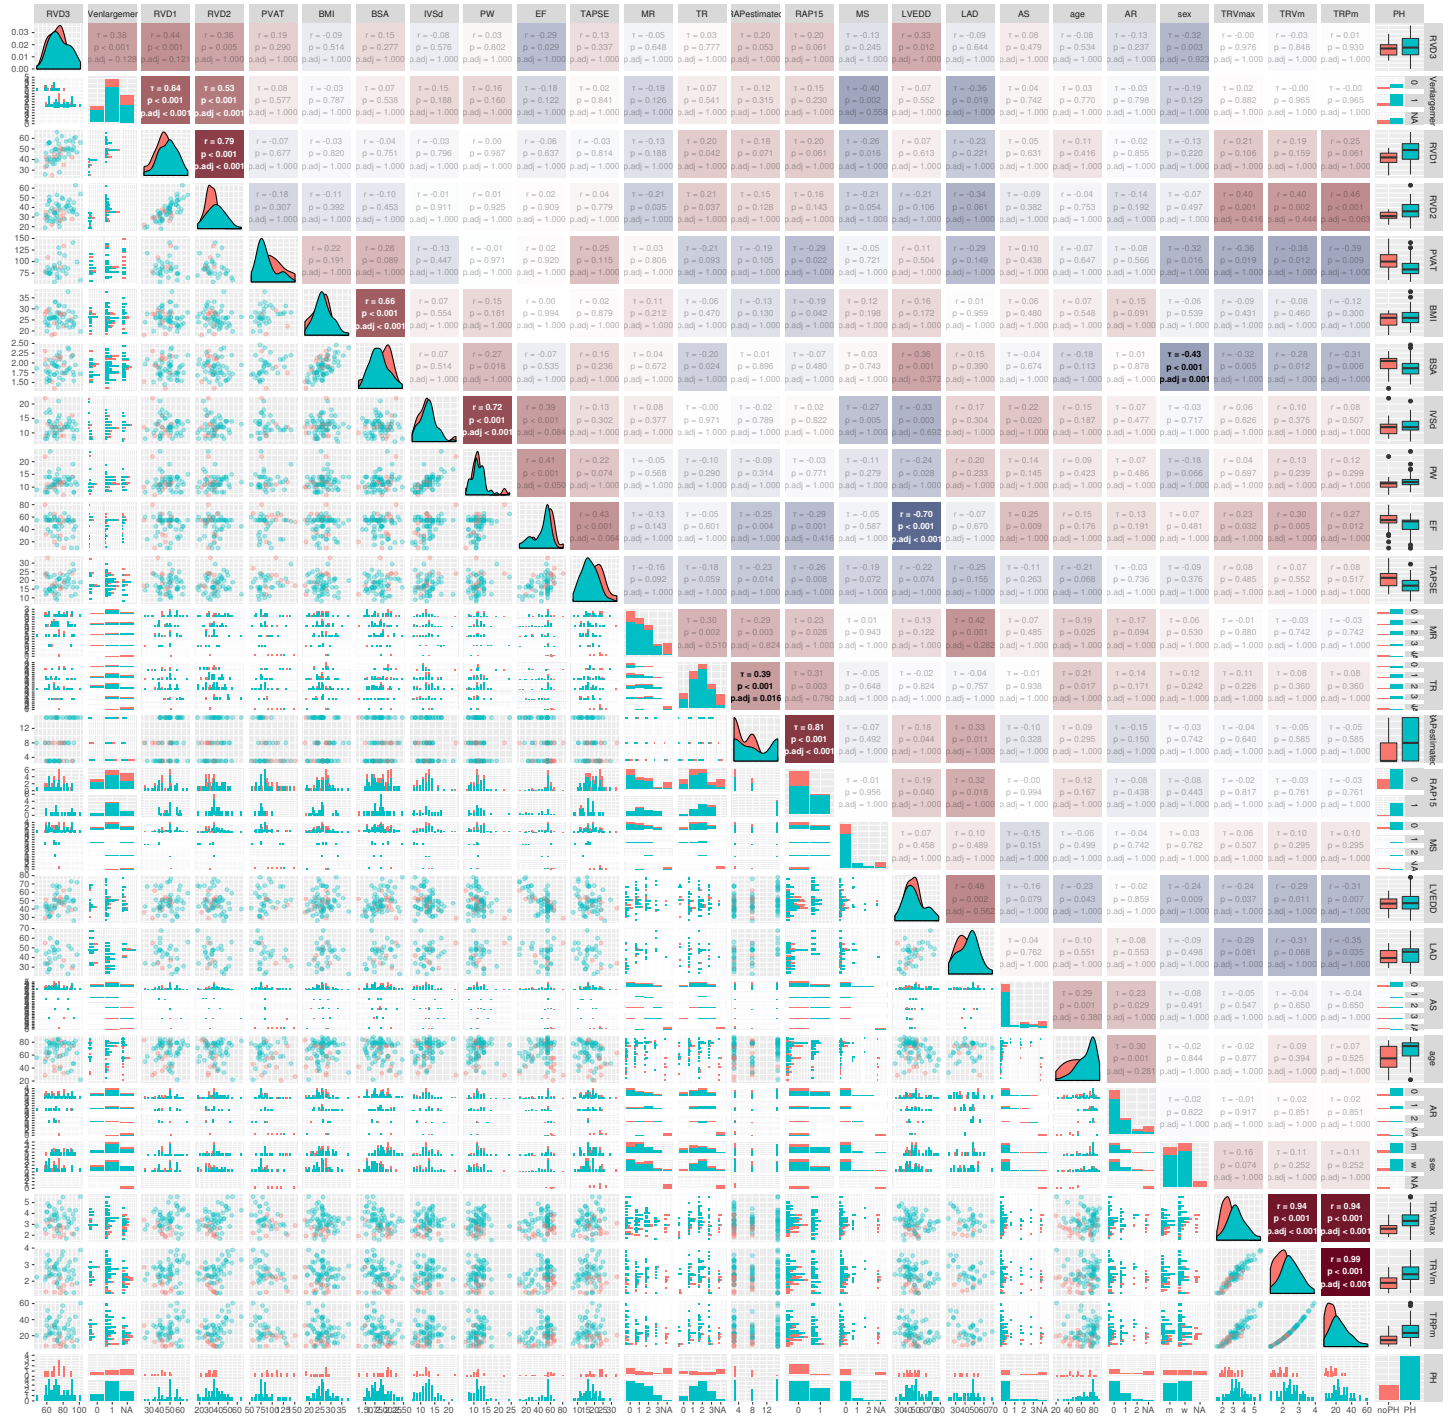

supplementary figure 1
