# Supplementary material for: A machine learning approach for the prediction of pulmonary hypertension
Source: PubMed Central journal article supplement (PMC6814224; doi:10.1371/journal.pone.0224453), 2019-10-25

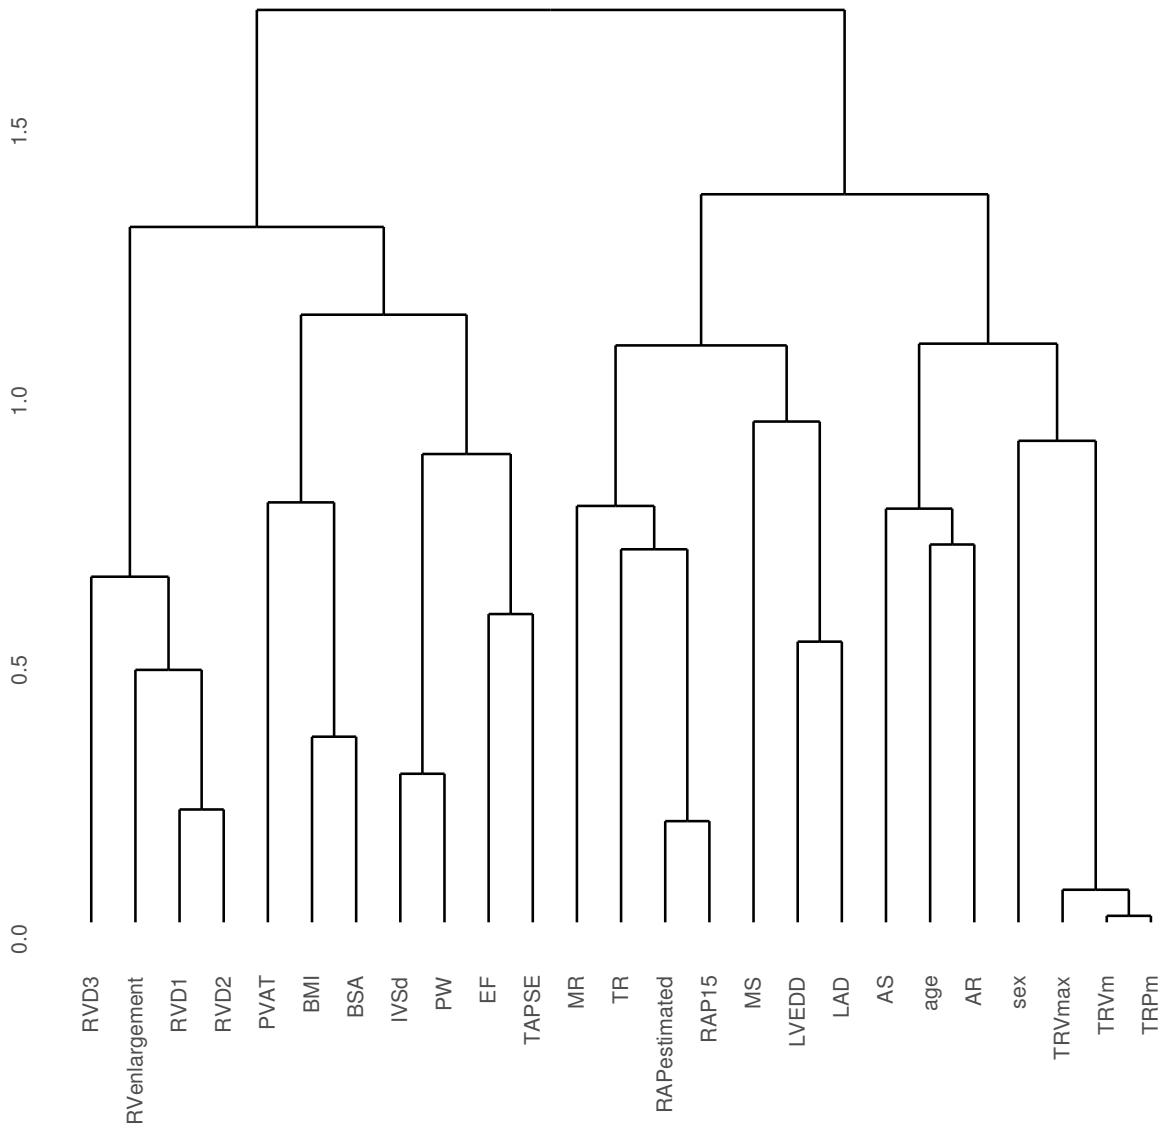

Supplement: pone.0224453.s002.pdf [file pone.0224453.s002.pdf]
