# Supplementary material for: A machine learning approach for the prediction of pulmonary hypertension
Source: PubMed Central journal article supplement (PMC6814224; doi:10.1371/journal.pone.0224453), 2019-10-25

(A)

Number of Samples in Each Test Set

folds are in the columns, repeats in the rows

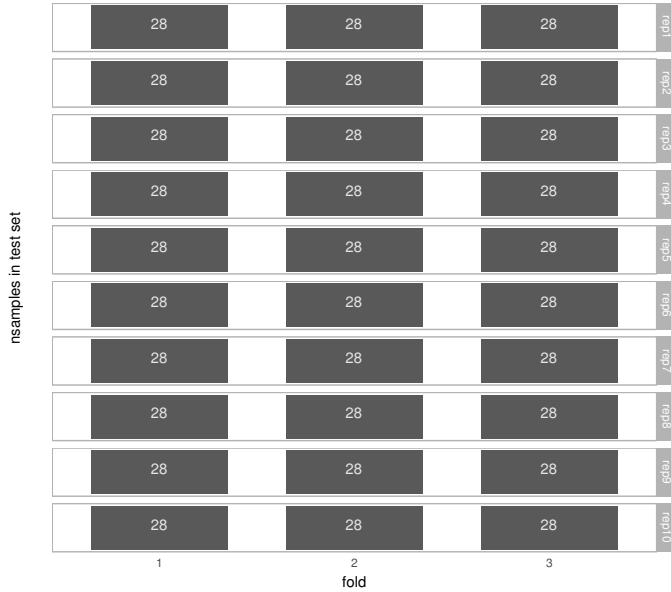

(B)

Training and Test Set in Each Fold

folds are in the columns, repeats in the rows; red represents the test set

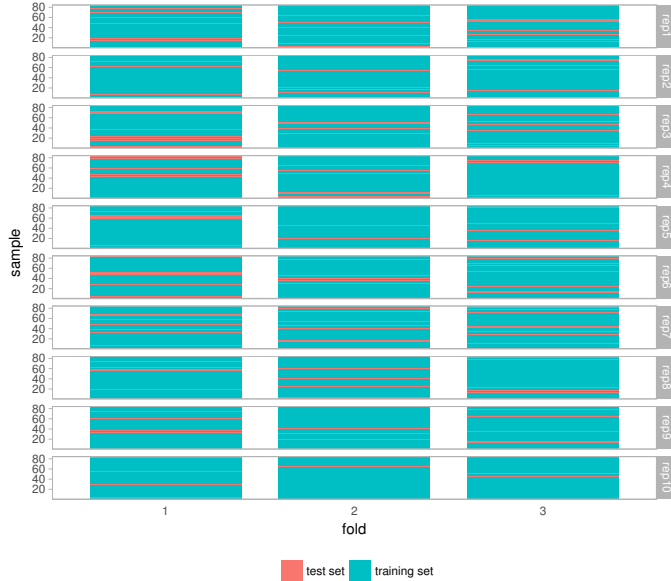

(C)

Distribution in the Training and Test Sets in Each Fold

folds are in the columns, repeats in the rows; red represents the test set

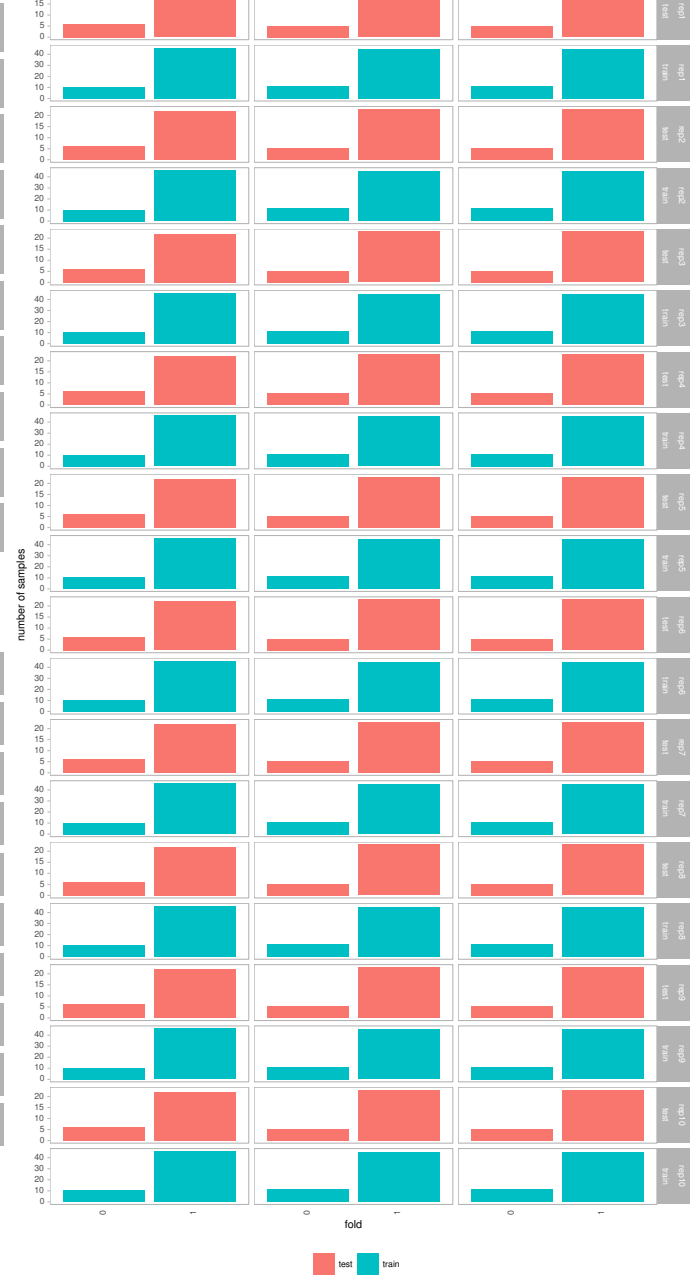

Supplement: pone.0224453.s003.pdf [file pone.0224453.s003.pdf]
