# Supplementary material for: A machine learning approach for the prediction of pulmonary hypertension
Source: PubMed Central journal article supplement (PMC6814224; doi:10.1371/journal.pone.0224453), 2019-10-25

**lasso penalized logistic regression**

grey lines: ROC curves from each CV-repetition  
black line: consensus ROC curve

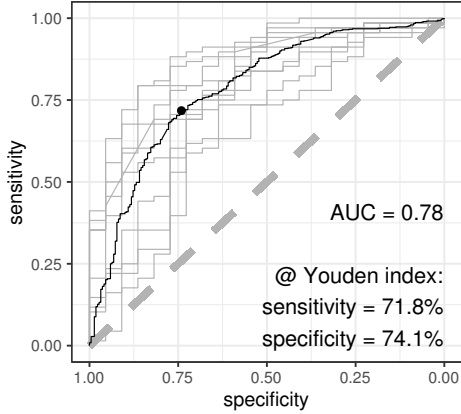

**SVM**

grey lines: ROC curves from each CV-repetition  
black line: consensus ROC curve

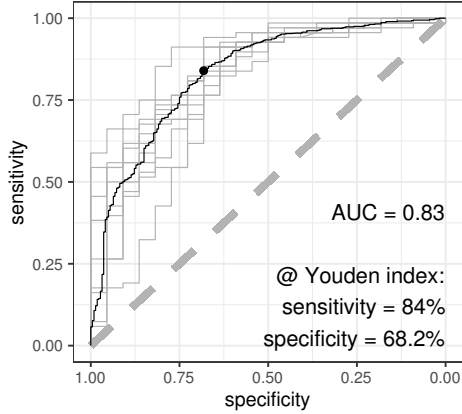

**boosted C5.0**

grey lines: ROC curves from each CV-repetition  
black line: consensus ROC curve

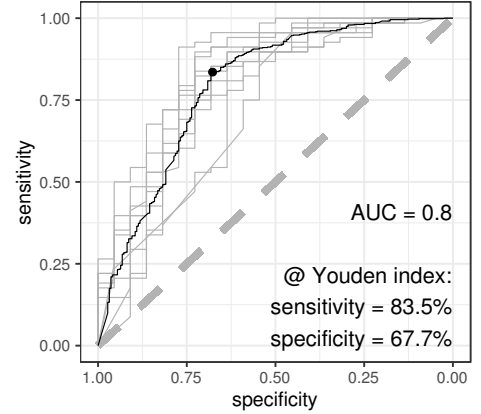

**random forest of classification trees**

grey lines: ROC curves from each CV-repetition  
black line: consensus ROC curve

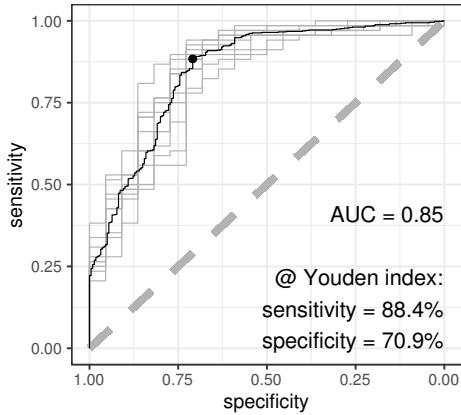

**random forest of regression trees**

grey lines: ROC curves from each CV-repetition  
black line: consensus ROC curve

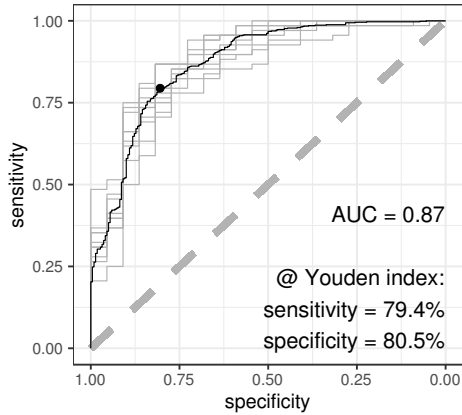

**random forest of regression trees with Aduen**

grey lines: ROC curves from each CV-repetition  
black line: consensus ROC curve

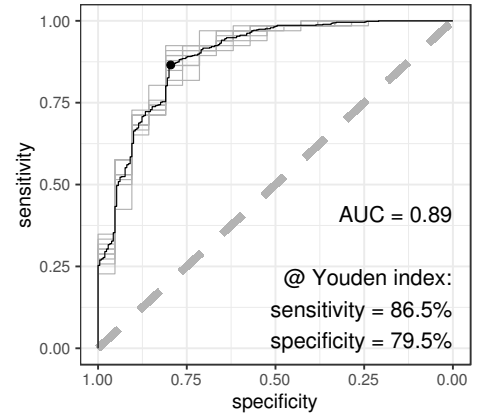

**Aduen et al.**

ROC curve as evaluated on the full data set

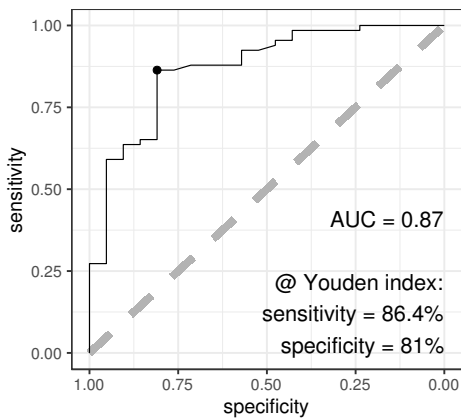

Supplement: pone.0224453.s004.pdf [file pone.0224453.s004.pdf]
