# Supplementary material for: A machine learning approach for the prediction of pulmonary hypertension
Source: PubMed Central journal article supplement (PMC6814224; doi:10.1371/journal.pone.0224453), 2019-10-25
Supplement: pone.0224453.s005.pdf [file pone.0224453.s005.pdf]

PR Curves

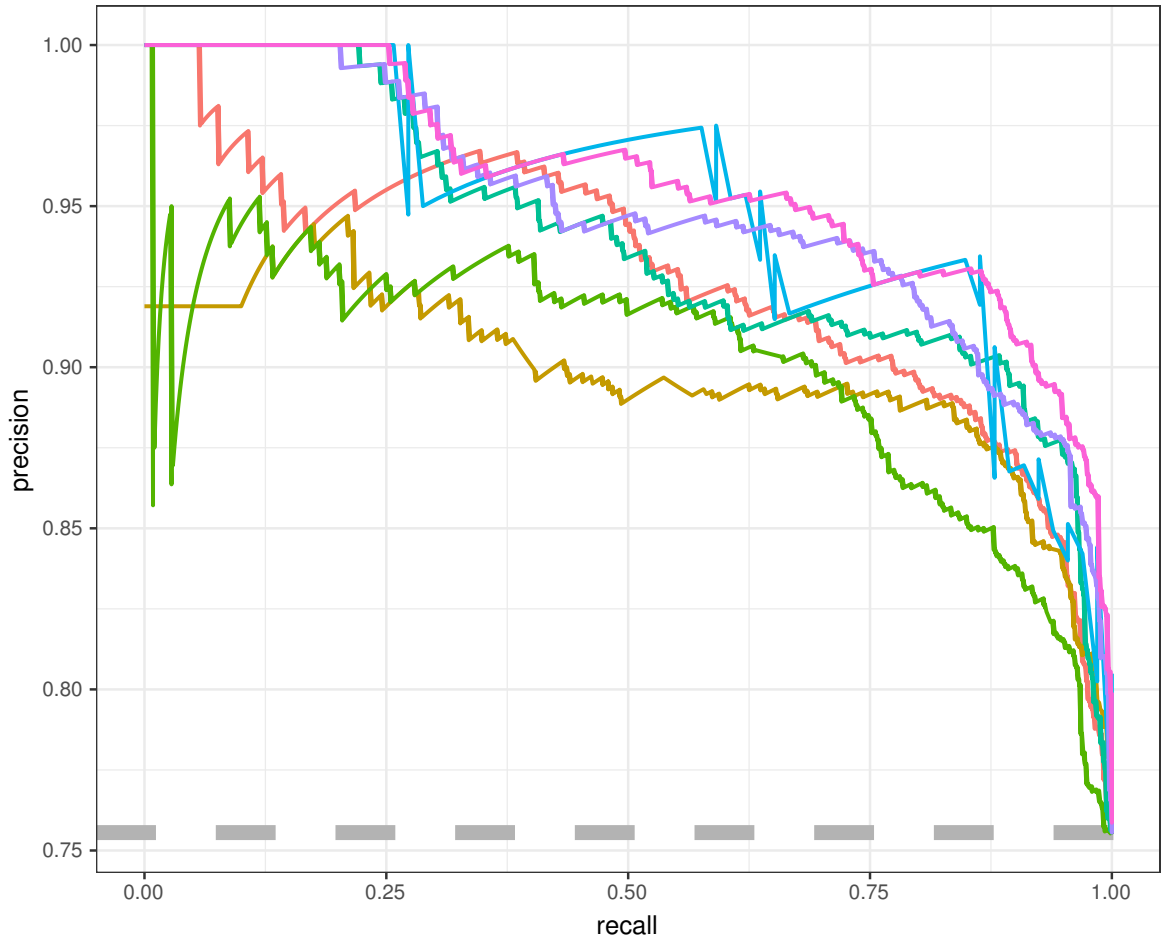

- SVM
- boosted C5.0
- lasso penalized logistic regression
- random forest of classification trees
- Aduen et al.
- random forest of regression trees with Aduen
- random forest of regression trees
