# Supplementary material for: A machine learning approach for the prediction of pulmonary hypertension
Source: PubMed Central journal article supplement (PMC6814224; doi:10.1371/journal.pone.0224453), 2019-10-25

lasso penalized logistic regression

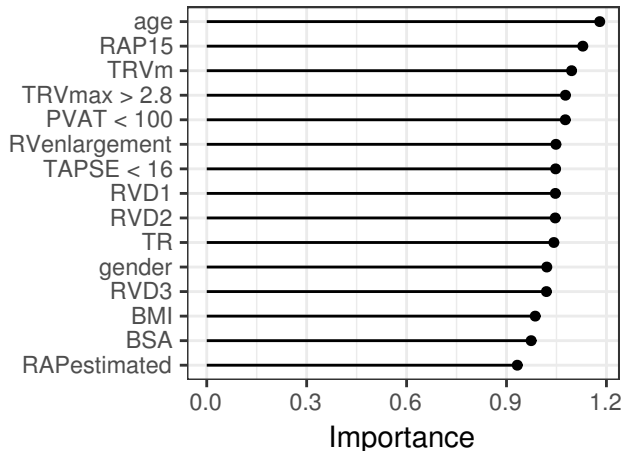

SVM

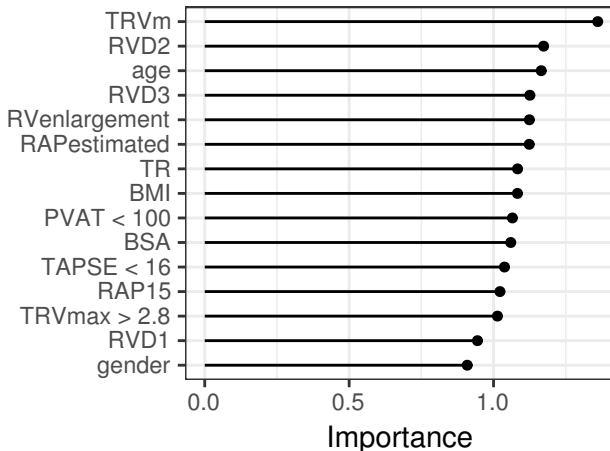

boosted C5.0

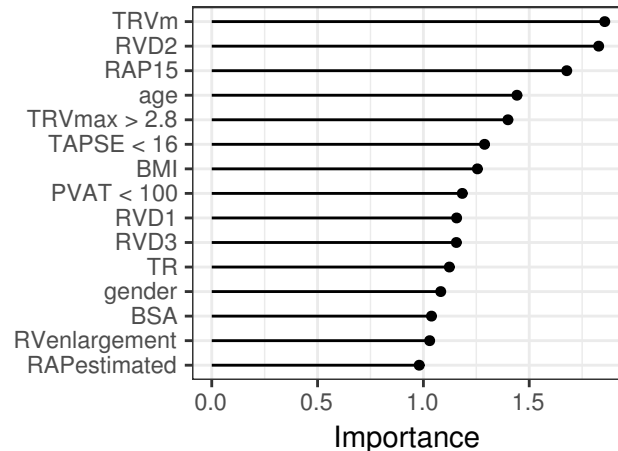

rfsrc (5000 trees)

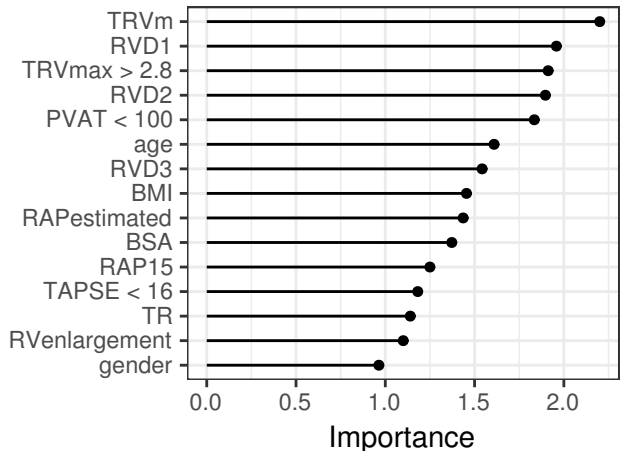

regression trees random forest with aduen (mean)

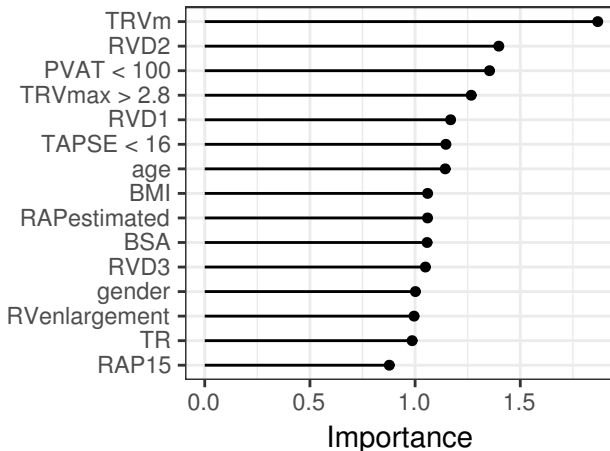

Supplement: pone.0224453.s007.pdf [file pone.0224453.s007.pdf]
